# Supplementary material
Source: publisher figshare collection journal article supplement (https://tandf.figshare.com/ndownloader/files/20382885)
Supplement: Supplementary file 1 [file 20382885]

Supplementary file 1. Search strategy used in Pubmed and Embase

Search strategy used in PubMed

(capsule endoscopy[Mesh] OR capsule endoscopes[Mesh] OR capsule endoscopy OR capsule endoscope OR vedio capsule) AND (retrieval OR removal OR extraction OR retention OR retained OR retrieve OR remove OR extract) AND (balloon enteroscopy[Mesh] OR single-balloon enteroscopy[Mesh] OR Double-balloon enteroscopy[Mesh] OR enteroscopy OR balloon OR small bowel endoscopy OR small bowel endoscope)

361 items found

Search strategy used in Embase

('capsule endoscopy'/exp OR 'capsule endoscopy' OR 'capsule endoscope' OR 'video capsule' OR 'm2a' OR 'pillcam') AND ('balloon enteroscopy'/exp OR 'balloon enteroscopy' OR 'balloon endoscopy' OR 'balloon endoscope' OR 'small bowel endoscopy' OR 'push and pull enteroscopy') AND (retrieval OR removal OR extraction OR retention OR retained OR retrieve OR remove OR extract)

209 items found
